# Supplementary material
Source: publisher site journal article supplement (https://www.dovepress.com/get_supplementary_file.php?f=310289.docx)
Supplement: Supplementary file 1 [file get_supplementary_file.php]

**Supplemental file 1**

**Questionnaire used in the study**

**Part A: Respondents’ demographics**

1. **Gender:** ❑ Female ❑ Male
2. **Age in years:** _ _

| **3. Monthly income** | ❑ Up to 13,450 NPR per month | ❑ 13,450-30,000 NPR per month | ❑ 30,000-60,000 NPR per month | ❑ More than 60,000 NPR per month |
| --- | --- | --- | --- | --- |
| **4.Education level** | ❑ Up to Secondary level | ❑ Intermediate level | ❑ Graduate level | ❑ Postgraduate level and above |
| **5.Marital status** | ❑ Married | ❑ Unmarried | ❑ Divorced | ❑ Widow/Widower |

1. **Your profession:**

**Health care worker** ❑

**Non health care worker** ❑

1. **What is your designation at Gandaki Medical College?**

❑ Managerial and administrative staff, engineer, biomedical technician, IT staffs

❑ Faculty (clinical, basic science, nursing)

❑ Post graduate Resident/Medical officer/Dental surgeon

❑ Hospital nursing Staff, ANM

❑ General worker, driver, security guard, plumber, electrician

❑ Paramedical staff

**Part B: Experiences and Perception**

1. **Have you been diagnosed COVID-19 positive?** ❑ Yes ❑ No
2. **Have any of your family members staying with you been diagnosed COVID-19 positive?**

❑ Yes ❑ No

1. **How much worried you were about you or family member contracting COVID-19?**
2. ❑ Extremely worried
3. ❑ Quite worried
4. ❑ Little worry
5. ❑ No worry
6. **Do you identify yourself at increased risk of infection with COVID-19?**

❑ Yes ❑ No ❑ Don’t know

**If no/don’t know; move to question no 11**

**If yes**, please mention reason/s from one or more choices below:

1. ❑ Co-morbid illness(es)
2. ❑ Old age
3. ❑ Job type where there is high contact with people
4. ❑ Providing care to family member suffering from COVID
5. ❑ Smoker
6. ❑ Obesity
7. ❑ Pregnancy
8. ❑ Others (please specify) …
9. **What is your perception of pandemic severity?** ❑ Mild ❑ Moderate ❑ Severe

**Part C: Vaccine safety**

1. **Do you think you are eligible to receive the vaccine?** ❑ Yes ❑ No ❑ Don’t know

**If no; move to question no 14.**

**If yes; please give reason (s) from one or more choices below:**

1. ❑ Co-morbid illness
2. ❑ Being elderly
3. ❑ Being a health care worker
4. ❑ All public should get access to vaccine
5. ❑ Job type where there is high contact with people
6. ❑ Other reasons (please specify): ….
7. **Are you willing to be vaccinated if vaccine is offered to you?**

**If no; move to question no 14.1**

**If yes, put your response below:**

1. ❑ Yes
2. ❑ No
3. ❑ Undecided
4. ❑ Will get vaccinated if there are less adverse effects

**14.1 Please give reasons for refusal:**

1. ❑ Vaccine is unnecessary for me
2. ❑ I am concerned about vaccine safety
3. ❑ I do not have belief in vaccination
4. ❑ I have already been infected with COVID-19
5. ❑ Others (please specify): ….

**15. Will you be concerned if vaccine is not offered to you?**

1. ❑ Extremely concerned.
2. ❑ Quite concerned.
3. ❑ Little concerned
4. ❑ Not concerned
5. ❑ Don’t know.

**16-26. Please tick on the appropriate response to each question given below**:

| **Vaccine Safety perceptions** | **Strongly Agree** | **Somewhat agree** | **Neutral/no opinion** | **Somewhat disagree** | **Strongly disagree** |
| --- | --- | --- | --- | --- | --- |
| 16. COVID 19 vaccine is safe. |  |  |  |  |  |
| 17. Myself or someone I know previously had a bad reaction to a vaccine which makes me reconsider getting vaccinated. |  |  |  |  |  |
| 18.I will receive a COVID-19 vaccine if it is proven safe and effective and is offered to me free of charge. |  |  |  |  |  |
| 19. If the government has approved a COVID-19 vaccine safe and effective, I am ready to comply with my employer’s recommendation. |  |  |  |  |  |
| 20. The information about safety I heard/read in the media/social media makes me reconsider the choice to be vaccinated. |  |  |  |  |  |
| 21. I share information related to vaccination safety within my social media network |  |  |  |  |  |
| 22. Health care workers provide sufficient information on side effects that follow vaccination. |  |  |  |  |  |
| 23. Pharmaceutical and biotech companies provide safe vaccines. |  |  |  |  |  |
| 24. Vaccines made in Europe or America are safer than those made in our region. |  |  |  |  |  |
| 25. I believe vaccines overload the immune system. |  |  |  |  |  |
| 26. Excipients (medium for a vaccine) used in vaccines can cause side effects. |  |  |  |  |  |

**Thank you for participating in the survey!!!**
